# Supplementary material
Source: PubMed Central journal article supplement (PMC3483039)
Supplement: NIHMS403621-supplement-1_si_001.pdf [file NIHMS403621-supplement-1_si_001.pdf]

Supplementary Information for:

# Chaperone Probes and Bead-Based Enhancement Improve the Direct Detection of mRNA Using Silicon Photonic Sensor Arrays

*Jared T. Kindt and Ryan C. Bailey\**

Department of chemistry, University of Illinois at Urbana-Champaign, 600 S. Matthews Ave,  
Illinois, 61801

Email: [baileyc@illinois.edu](mailto:baileyc@illinois.edu)

\*To whom correspondence should be addressed.

## **Table of Contents**

|                                     |   |
|-------------------------------------|---|
| Nucleic Acid Sequences .....        | 2 |
| C-myc .....                         | 2 |
| $\beta$ -actin .....                | 4 |
| IL-8 .....                          | 6 |
| Capture Probe Specificity .....     | 8 |
| HL-60 Flow Cytometry Analysis ..... | 9 |

## Nucleic Acid Sequences

### C-myc

**Table S-1.** C-myc DNA capture probe, chaperone, and primary transcript sequences. Epitopes targeted by DNA capture probes are bolded and underlined

|                  | Capture Probe Sequences                                                | Length | Nucleotide position from 5' End |
|------------------|------------------------------------------------------------------------|--------|---------------------------------|
| Myc <sub>1</sub> | 5'-/5AmMC12/TTC GTG GAT GCG GCA AGG GT-3'                              | 20     | 340-359                         |
| Myc <sub>2</sub> | 5'-/5AmMC12/GAG TTC CGT AGC TGT TCA AGT TTG TGT T-3'                   | 28     | 1853-1880                       |
| Myc <sub>3</sub> | 5'-/5AmMC12/ACC ACC GAG GGG TCG ATG CA-3'                              | 20     | 1132-1151                       |
|                  | Chaperone Sequences                                                    |        |                                 |
| 1                | TGC GGA CCG CTG GCT GGG GGA AAA AAA AAA AAA AAA AAA AAA AAA AAA AA     |        |                                 |
| 2                | AAA ACC GCT GCT ATG GGC AAA GT     |        |                                 |
| 3                | CTC TGA GGC GGC GGC GCT CAA AAA AAA AAA AAA AAA AAA AAA AAA AAA AA     |        |                                 |
| 4                | AAA CGT TGA GAG GGT AGG GGA AG     |        |                                 |
| 5                | TCA ACT GTT CTC GTC GTT TCA AAA AAA AAA AAA AAA AAA AAA AAA AAA AA     |        |                                 |
| 6                | AAA TTA CTT TTC CTT ACG CAC AA |        |                                 |
| 7                | AAA ACA ATT CTT AAA TAC AAA AA     |        |                                 |
| 8                | AAA ATT GAA ATT CTG TGT AAC TG |        |                                 |
| 9                | AAA CTC CTC TGG CGC TCC AAG AC |        |                                 |
| 10               | AAA TCC AGA CTC TGA CCT TTT GC |        |                                 |
| 11               | AAA CCT GTT GGT GAA GCT AAC GT |        |                                 |
| 12               | GGC GGC CGC GAG CAG CAC AGA AAA AAA AAA AAA AAA AAA AAA AAA AAA AA     |        |                                 |

1 GACCCCGAG CTGTGCTGCT CGCGGCCGCC ACCGCCGGG CCCGGCCGTC CCTGGCTCCC  
61 CTCCTGCCTC GAGAAGGGCA GGGCTTCTCA GAGGCTTGGC GGGAAAAGA ACGGAGGGAG  
121 GGATCGCGCT GAGTATAAA GCCGGTTTTT GGGGCTTTAT CTAACCTCGCT GTAGTAATTC  
181 CAGCGAGAGG CAGAGGGAGC GAGCGGGCGG CCGGCTAGGG TGGAAGAGCC GGGCGAGCAG  
241 AGCTGCGCTG CGGGCGTCCT GGAAGGGAG ATCCGGAGCG AATAGGGGGC TTCGCCTCTG  
301 GCCCAGCCCT CCCGCTGATC CCCAGCCAG CGGTCCGCA CCCTTGCCGC ATCCACGAAA  
361 CTTTGCCCAT AGCAGCGGGC GGGCACTTTG CACTGGAAC TACAACACC GAGCAAGGAC  
421 GCGACTCTCC CGACGCGGGG AGGCTATTCT GCCATTTGG GGACACTTCC CCGCCGCTGC  
481 CAGGACCCGC TTCTCTGAAA GGCTCTCCTT GCAGCTGCTT AGACGCTGGA TTTTTTTCGG  
541 GTAGTGGA AAA ACCAGCAGCC TCCCGCGACG ATGCCCTCA ACGTTAGCTT CACCAACAGG  
601 AACTATGACC TCGACTACGA CTCGGTGCAG CCGTATTCT ACTGCGACGA GGAGGAGAAC  
661 TTCTACCAGC AGCAGCAGCA GAGCGAGCTG CAGCCCCCGG CGCCAGCGA GGATATCTGG  
721 AAGAAATTCG AGCTGCTGCC CACCCCGCC CTGTCCCTA GCCGCCGCTC CGGGCTCTGC  
781 TCGCCCTCCT ACGTTGCGGT CACACCCTT TCCCTTCGGG GAGACAACGA CGGCGGTGGC  
841 GGGAGCTTCT CCACGGCCGA CCAGCTGGAG ATGGTGACCG AGCTGCTGGG AGGAGGACATG  
901 GTGAACCAGA GTTTCATCTG CGACCCGGAC GACGAGACCT TCATCAAAAA CATCATCATC  
961 CAGGACTGTA TGTGGAGCGG CTTCTCGGC GCCGCCAAGC TCGTCTCAGA GAAGCTGGCC  
1021 TCCTACCAGG CTGCGCGCAA AGACAGCGGC AGCCGAACC CCGCCCGCGG CCACAGCGTC  
1081 TGCTCCACCT CCAGCTTGTA CCTGCAGGAT CTGAGCGCCG CCGCCTCAGA GTGCATCGAC  
1141 CCCTCGGTGG TCTTCCCCTA CCCTCTAAC GACAGCAGCT CGCCCAAGTC CTGCGCCTCG  
1201 CAAGACTCCA GCGCCTTCTC TCCGTCTCG GATTCTCTGC TCTCCTCGAC GGAGTCCTCC  
1261 CCGCAGGGCA GCCCCGAGCC CCTGGTGCTC CATGAGGAGA CACCGCCAC CACCAGCAGC  
1321 GACTCTGAGG AGGAACAAGA AGATGAGGAA GAAATCGATG TTGTTTCTGT GGAAAAGAGG  
1381 CAGGCTCCTG GCAAAGGTC AGAGTCTGGA TCACCTTCTG CTGGAGGCCAA CAGCAAACCT  
1441 CCTCACAGCC CACTGGTCCT CAAGAGGTGC CACGTCTCCA CACATCAGCA CAACTACGCA  
1501 GCGCCTCCCT CACTCGGAA GACTATCCT GCTGCCAAGA GGTCAAGTT GGACAGTGTC  
1561 AGAGTCTGA GACAGATCAG CAACAACCGA AAATGCACCA GCCCAGGTC CTCGGACACC  
1621 GAGGAGAATG TCAAGAGGCG AACACACAAC GTCTTGAGC GCCAGAGGAG GAACGAGCTA  
1681 AAACGGAGCT TTTTGCCCT GCGTGACCAG ATCCCGGAGT TGAAAACAA TGAAAAGGCC  
1741 CCCAAGGTAG TTATCCTTAA AAAAGCCACA GCATACATCC TGTCCTGCA AGCAGAGGAG  
1801 CAAAAGCTCA TTTCTGAAGA GACTTGTTG CGGAAACGAC GAGAACAGTT GAAACACAAA  
1861 CTTGAACAGC TACGGAACTC TTGTGCGTAA GGAAAAGTAA GGAAAACGAT TCCTTCTAAC  
1921 AGAAATGTCC TGAGCAATCA CCTATGAACT TGTTCAAAT GCATGATCAA ATGCAACCTC  
1981 ACAACCTTGG CTGAGTCTTG AACTGAAAG ATTTAGCCAT AATGTAAACT GCCTCAAATT  
2041 GGACTTTGGG CATAAAAGAA CTTTTTATG CTTACCATCT TTTTTTTT TTTAACAGAT  
2101 TTGTATTTAAGAATTGTTTT TAAAAAATTT TAAGATTTAC ACAATGTTT TCTGTAAATA  
2161 TTGCCATTAA ATGTAAATAA CTTAATAAA ACGTTTATAG CAGTTACACA GAATTTCAAT  
2221 CCTAGTATAT AGTACCTAGT ATTATAGGTA CTATAAACC TAATTTTTTT TATTTAAGTA  
2281 CATTTTGCTT TTAAAGTTG ATTTTTTTCT ATTGTTTTTA GAAAAAATAA AATAACTGGC  
2341 AAATATATCA TTGAGCCAAA TCTTAAAAA AAAAAAAAAA

## $\beta$ -actin

**Table S-2.**  $\beta$ -actin DNA capture probe, chaperone, and primary transcript sequences. Epitopes targeted by DNA capture probes are bolded and underlined

|                  | Capture Probe Sequence                                                 | Length | Nucleotide position from 5' End |
|------------------|------------------------------------------------------------------------|--------|---------------------------------|
| Act <sub>1</sub> | 5'-/5AmMC12/GCGGTTGGCCTTGGGGTTCA                                       | 20     | 413-432                         |
| Act <sub>2</sub> | 5'-/5AmMC12/TAGCCGCGCTCGGTGAGGAT                                       | 20     | 658-677                         |
| Act <sub>3</sub> | 5'-/5AmMC12/TGATCTCCTTCTGCATCCTGTTCGGCAA                               | 27     | 1010-1036                       |
|                  |                                                                        |        |                                 |
|                  | Chaperones                                                             |        |                                 |
| 1                | CGG CAA AGG CGA GGC TCT GTA AAA AAA AAA AAA AAA AAA AAA AAA AAA AA     |        |                                 |
| 2                | GAG GAT GCC TCT CTT GCT CTA AAA AAA AAA AAA AAA AAA AAA AAA AAA AA     |        |                                 |
| 3                | GGC CTC GGT CAG CAG CAC GGA AAA AAA AAA AAA AAA AAA AAA AAA AAA AA     |        |                                 |
| 4                | AAA ATG ATC TGG GTC ATC TTC TC |        |                                 |
| 5                | CTT CAT GAG GTA GTC AGT CAA AAA AAA AAA AAA AAA AAA AAA AAA AAA AA     |        |                                 |
| 6                | AAA CGG CCG TGG TGG TGA AGC TG |        |                                 |
| 7                | TGC CAG GGT ACA TGG TGG TGA AAA AAA AAA AAA AAA AAA AAA AAA AAA AA     |        |                                 |
| 8                | AAA TGT GCT GGG TGC CAG GGC AG |        |                                 |
| 9                | GTG TAA CGC AAC TAA GTC ATA AAA AAA AAA AAA AAA AAA AAA AAA AAA AA     |        |                                 |
| 10               | CAT CTC ATA TTT GGA ATG ACA AAA AAA AAA AAA AAA AAA AAA AAA AAA AA     |        |                                 |
| 11               | AAA AAG TGG GGT GGC TTT TAG GA |        |                                 |
| 12               | CCT TCA TAC ATC TCA AGT TGA AAA AAA AAA AAA AAA AAA AAA AAA AAA AA     |        |                                 |

1 ACCGCGUCCG CCCC GCGAGC ACAGAGCCUC GCCUUUGCCG AUCCGCGCC CGUCCACACC  
61 CGCCGCCAGC UCACCAUGGA UGAUGAUUUC GCCGCGCUCG UCGUCGACAA CGGCUCCGGC  
121 AUGUGCAAGG CCGGCUUCGC GGGCGACGAU GCCCCCCGGG CCGUCUCCCC CUCCAUCGUG  
181 GGGCGCCCCA GGCACCAGGG CGUGAUGGUG GGCAUGGGUC AGAAGGAUUC CUAUGUGGGC  
241 GACGAGGCCC AGAGCAAGAG AGGCAUCCUC ACCCUGAAGU ACCCCAUCGA GCACGGCAUC  
301 GUCACCAACU GGGACGACAU GGAGAAAUC UGGCACCACA CCUUCUACAA UGAGCUGCGU  
361 GUGGCUCCCG AGGAGCACCC CGUGCUGCUG ACCGAGGCCC CCUGAACCC CAAGGCCAAC  
421 CGCGAGAAGA UGACCCAGAU CAUGUUUGAG ACCUUAACA CCCAGCCAU GUACGUUGCU  
481 AUCCAGGCUG UGCUAUCCCU GUACGCCUCU GGCCGUACCA CUGGCAUCGU GAUGGACUCC  
541 GGUGACGGGG UCACCCACAC UGUGCCCAUC UACGAGGGGU AUGCCCUCUCC CCAUGCCAUC  
601 CUGCGUCUGG ACCUGGCUGG CCGGGACCUG ACUGACUACC UCAUGAAGAU CCUCACCGAG  
661 CGCGGCUACA GCUUCACCAC CACGGCCGAG CGGGAAAUCG UGCGUGACAU UAAGGAGAAG  
721 CUGUGCUCACG UCGCCUGGA CUUCGAGCAA GAGAUGGCCA CGGCUGCUUC CAGCUCCUCC  
781 CUGGAGAAGA GCUACGAGCU GCCUGACGGC CAGGUCAUCA CCAUUGGCAA UGAGCGGUUC  
841 CGCUGCCUUG AGGCACUCUU CCAGCCUUC UCCUGGGCA UGGAGUCCUG UGGCAUCCAC  
901 GAAACUACCU UCAACUCCAU CAUGAAGUGU GACGUGGACA UCCGCAAAGA CCUGUACGCC  
961 AACACAGUGC UGUCUGGCGG CACCACCAUG UACCCUGGCA UUGCCGACAG GAUGCAGAAG  
1021 GAGAUCACUG CCCUGGCACC CAGCACA AUG AAGAUCAAGA UCAUUGCUCC UCCUGAGCGC  
1081 AAGUACUCCG UGUGGAUCGG CGGCUCUCC CUGGCCUCGC UGUCCACCUU CCAGCAGAUG  
1141 UGGAUCAGCA AGCAGGAGUA UGACGAGUCC GGCCCCUCA UCGUCCACCG CAAUUGCUUC  
1201 UAGGCGGACU AUGACUAGU UGCGUUACAC CCUUCUUGA CAAAACCUAA CUUGCGCAGA  
1261 AAACAAGAUG AGAUUGGCAU GGCUUUAUUU GUUUUUUUUG UUUUGUUUUG GUUUUUUUUU  
1321 UUUUUUUUGG CUUGACUCAG GAUUUAAAAA CUGGAACGGU GAAGGUGACA GCAGUCGGU  
1381 GGAGCGAGCA UCCCCAAAG UUCACAAUGU GGCCGAGGAC UUUGAUUGCA CAUUGUUGU  
1441 UUUUAAUAG UCAUUCCAA UAUGAGAU GCUGUUACAG GAAGUCCCUU GCCAUCCUAA  
1501 AAGCCACCC ACUUCUCUCU AAGGAGAAUG GCCCAGUCCU CUCCCAAGUC CACACAGGGG  
1561 AGGUGAUAGC AUUGCUCUCG UGUAAAUAU GUAAUGCAA AUUUUUUUA UCUUCGCCU  
1621 AAUACUUUU UAUUUUGUU UAUUUUGAAU GAUGAGCCU CGUGCCCCC CUUCCCCU  
1681 UUUUGUCCCC CAACUUGAGA UGUAUGAAG CUUUUGGUCU CCCUGGGAGU GGGUGGAGGC  
1741 AGCCAGGCU UACCUGUACA CUGACUUGAG ACCAGUUGAA UAAAAGUGCA CACCUAAAA  
1801 AAAAAAAAAA AAAAAAAAAA

**IL-8**

**Table S-3.** IL-8 DNA capture probe, chaperone, and primary transcript sequences. Epitopes targeted by DNA capture probes are bolded and underlined

|                 | Capture Probe Sequence                                                     | Length | Nucleotide position from 5' End |
|-----------------|----------------------------------------------------------------------------|--------|---------------------------------|
| IL <sub>1</sub> | TTCTGTGTTGGCGCAGTGTGGT                                                     | 22     | 327-348                         |
| IL <sub>2</sub> | TGGCCCTTGGCCTCAATTTTGCT                                                    | 23     | 747-769                         |
| IL <sub>3</sub> | ACTGTGAGGTAAGATGGTGGCTAAT                                                  | 25     | 999-1023                        |
|                 | Chaperone Sequences                                                        |        |                                 |
| 1               | AAA TGG AAG TCA<br>TGT TTA CAC AC      |        |                                 |
| 2               | CCA CTC TCA ATC ACT CTC AGA AAA AAA AAA AAA AAA AAA<br>AAA AAA AAA AA      |        |                                 |
| 3               | A AAA AA TCA GAA<br>AGC TTT ACA ATA AT |        |                                 |
| 4               | AAA CCA GGA ATC<br>TTG TAT TGC AT  |        |                                 |
| 5               | ATT TGT ATA TTC TCC CGT GCA AAA AAA AAA AAA AAA AAA<br>AAA AAA AAA AA      |        |                                 |
| 6               | A AAA AA TTA AAG TTC<br>GGA TAT TCT CT |        |                                 |
| 7               | AAA AGG ATT TCC<br>AGC TAA ATT TG  |        |                                 |
| 8               | ACT TTT TCC ACT TAG AAA TAA AAA AAA AAA AAA AAA AAA<br>AAA AAA AAA AA      |        |                                 |
| 9               | A AAA AA CCA CAT GTC<br>CTC ACA ACA TC |        |                                 |
| 10              | ATA ATG TAC TTA TAC TAA AAAAA AAA AAA AAA AAA AAA<br>AAA AAA AAA AAA       |        |                                 |
| 11              | A AAA AATGG GAG TAT<br>CAA ACT AGG AT  |        |                                 |
| 12              | GAA TCT ATT TGT ACA TAA TAA AAA AAA AAA AAA AAA AAA<br>AAA AAA AAA AA      |        |                                 |

1 GAAUUCGGCA CGAGGCAGCA GAGCACACAA GCUUCUAGGA CAAGAGCCAG GAAGAAACCA  
61 CCGGAAGGAA CCAUCUCACU GUGUGUAAAC AUGACUCCA AGCUGGCCGU GGCUCUCUUG  
121 GCAGCCUUC UGAUUUCUGC AGCUCUGUGU GAAGGUGCAG UUUUGCCAAG GAGUGCUIAA  
181 GAACUUAGAU GUCAGUGCAU AAAGACAUAC UCCAAACCUU UCCACCCCAA AUUUAUCAA  
241 GAACUGAGAG UGAUUGAGAG UGGACCACAC UGCGCCAACA CAGAAAUUAU UGUAAAGCUU  
301 UCUGAUGGAA GAGAGCUCUG UCUGGACCCC AAGGAAAACU GGGUGCAGAG GGUUGUGGAG  
361 AAGUUUUUGA AGAGGGCUGA GAAUUCAUAA AAAAAUUCAU UCUCUGUGGU AUCCAAGAAU  
421 CAGUGAAGAU GCCAGUGAAA CUUCAAGCAA AUCUACUUCA ACACUUCAUG UAUUGUGUGG  
481 GUCUGUUGUA GGGUUGCCAG AUGCAAUACA AGAUUCCUGG UAAAAUUUGA AUUUCAGUAA  
541 ACAUGAAUA GUUUUUCAUU GUACCAUGAA AUAUCCAGAA CAUACUUAUA UGUAAAGUUA  
601 UAUUUUUUG AAUCUACAAA AAACAACAAA UAAUUUUUAA AUUAUAGGAU UUUCCUAGAU  
661 AUUGCACGGG AGAAUAUACA AAUAGCAAAA UUGAGGCCAA GGGCCAAGAG AAUAUCCGAA  
721 CUUUAUUUC AGGAAUUGAA UGGGUUUGCU AGAAUGUGAU AUUUGAAGCA UCACUAAAA  
781 AUGAUGGGAC AAUAAAUUUU GCCAUAAAGU CAAAUUUAGC UGGAAAUCCU GGAUUUUUUU  
841 CUGUAAAAUC UGGCAACCCU AGUCUGCUAG CCAGGAUCCA CAAGUCCUUG UUCCACUGUG  
901 CCUUGGUUUC UCCUUUAUUU CUAAGUGGAA AAAGUAUUAG CCACCAUCUU ACCUCACAGU  
961 GAUGUUGUGA GGACAUGUGG AAGCACUUUA AGUUUUUUA UCAUAACAU AAUAUUUUC  
1021 AAGUGUAACU UAUUAACCUA UUUUAUUUU AUGUAUUUAU UUAAGCAUCA AAUAUUUGUG  
1081 CAAGAAUUUG GAAAAUAGA AGAUGAAUCA UUGAUUGAAU AGUUAUAAAG AUGUUAUAGU  
1141 AAUUUUUUU UAUUUUAGAU AUUAAAUGAU GUUUUAUUAG AUAAAUUUCA AUCAGGGUUU  
1201 UUAGAUUAAA CAAACAAACA AUUGGGUACC CAGUAAAAU UUCAUUUCAG AUUAACAACA  
1261 AAUAAUUUUU UAGUAUAAGU ACAUUAUUGU UUAUCUGAAA UUUUAAUUGA ACUAACAUC  
1321 CUAGUUUGAU ACUCCCAGUC UUGUCAUUGC CAGCUGUGUU GGUAGUGCUG UGUUGAAUUA  
1381 CGGAAUAAUG AGUUAGAACU AUUAAAACAG CAAAACUCC ACAGUCAUA UUAGUAAUUU  
1441 CUUGCUGGUU GAAACUUGU UAUUAUGUAC AAUAGAUUC UUAUAAUUAU AUUAAAUGA  
1501 CUGCAUUUUU AAUACAAGG CUUUAUUAUU UUAACUUUA GAUGUUUUUA UGUGCUCUCC  
1561 AAUUUUUUU UACUGUUUCU GAUUGUAUGG AAUUAUAAA GUAAUAUGA ACAUUUAAA  
1621 AUAAUUUUUG UUGUCAAGC AAAAAAAAAA AAAAAAACU CGAC

## Capture Probe Specificity

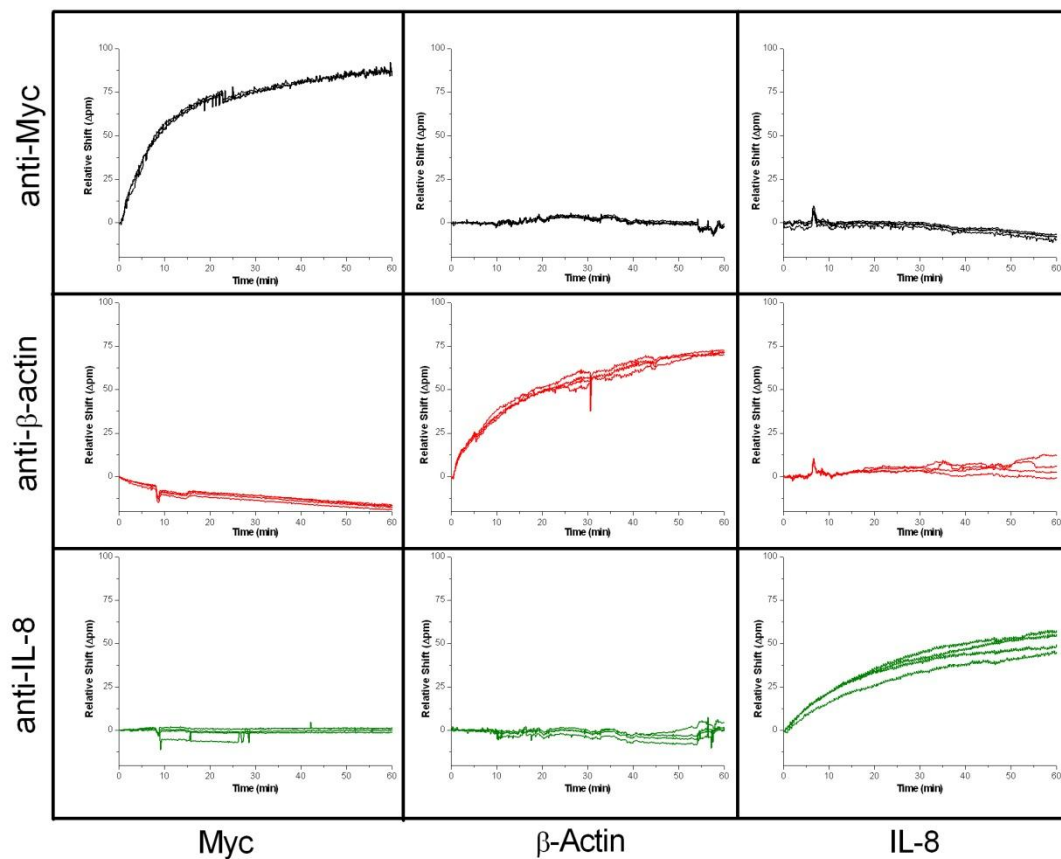

**Figure S-1.** (a) Array of sensor responses to 10 nM complementary and noncomplementary targets. Sensors functionalized towards a specific mRNA only illicit a response when incubated with the complementary mRNA target, as shown by the high responses diagonally across the array, confirming the specificity of the capture DNA probes.



## HL-60 Flow Cytometry Analysis

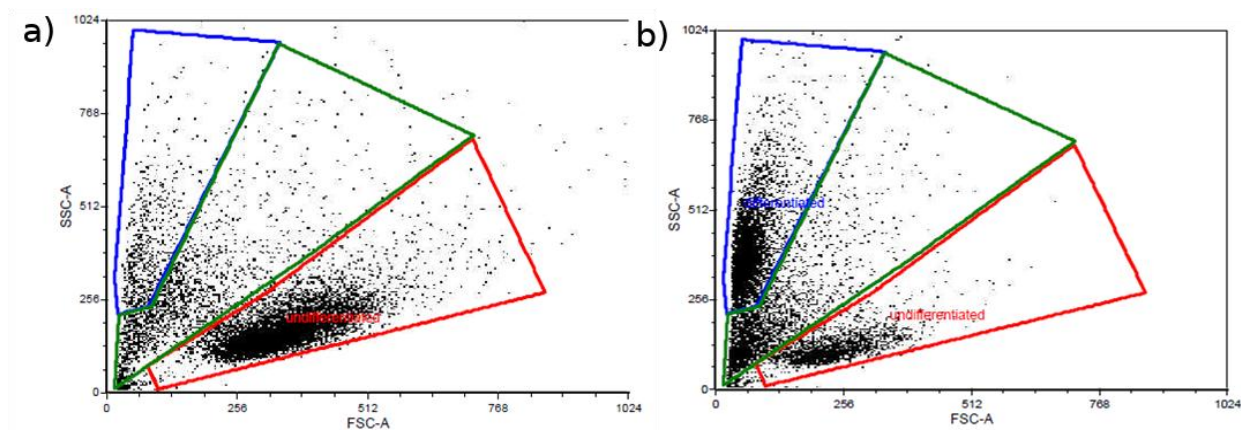

**Figure S-3.** (a) Flow Cytometry Analysis of native HL-60 cells and (b) seven days after differentiation. Cells are gated as undifferentiated (red), differentiated (blue), or nonviable (green).

**Table S-4:** Sharp changes in relative population abundances for HL-60 cells with and without 1.3% DMSO treatment indicate the efficacy of differentiation treatment.

|                  | Untreated | DMSO Treated |
|------------------|-----------|--------------|
| Undifferentiated | 75.94 %   | 18.98 %      |
| Differentiated   | 7.00 %    | 53.64 %      |
| Nonviable        | 17.05 %   | 27.37 %      |
